# Supplementary material for: A comparative isotopic study of the biogeochemical cycle of carbon in modern stratified lakes: the hidden role of DOC
Source: Copernicus journal article supplement (doi:10.5194/bg-2022-149), 2022-07-14
Supplement: Supplementary file 1 [file bg-2022-149-supplement.pdf]

# 1 **Supplementary material for “A comparative isotopic study of the** 2 **biogeochemical cycle of carbon in modern stratified lakes: the** 3 **hidden role of DOC”**

4 Robin Havas, Christophe Thomazo, Miguel Iniesto, Didier Jézéquel, David Moreira, Rosaluz Tavera, Jeanne  
5 Caumartin, Elodie Muller, Purificación López-García, Karim Benzerara

## 7 **Supplementary Text**

### 8 *Chlorophyll a peak in the hypolimnion of Alberca de les Espinos*

9 In the main text, discussion part 5.2.3., we discuss the primary production occurring in the hypolimnion of the  
10 Mexican lakes. In La Alberca de los Espinos we recorded a peak of chlorophyll a (Chl. a) in the anoxic waters at  
11 depths between 15 and 20 m, reaching the same concentrations as in the upper oxygenated waters (Fig. 2).  
12 However, this photosynthetic pigment is used as a proxy for oxygenic photosynthesis and thus not usually found  
13 in anoxic conditions.

14 The occurrence of oxygenic organisms in anoxic waters could have several explanations: (i) the Chl. a peak  
15 corresponds to a daily vertical migration of phytoplankton, (ii) the distribution of planktonic ecological niches  
16 with depth is inherited from the mixing period and did not change despite seasonally implemented stratification of  
17 the water column at the time of sampling or (iii) the Chl. a detected by the multi-parameter probe is mistaken with  
18 another photosynthetic pigment from anaerobic microorganisms, such as some bacteriochlorophylls which have  
19 similar absorption and emission spectra (Taniguchi and Lindsey, 2021 and references therein).

20 The first two possibilities rely on the presence of cyanobacteria and/or eukaryotic algae under anoxic conditions  
21 either as “dormant” forms or active forms with a facultative anaerobic activity. A significant [DOC] increase at  
22 the same depth than this Chl. a peak suggests the presence of active organisms releasing DOC in the anoxic waters  
23 (~17 m, Fig. 3). Meanwhile, cyanobacteria can be specifically targeted by the phycocyanin pigment and are only  
24 found to match the Chl. a peak around 12-13 m (Fig. 2). Besides, unicellular eukaryotic algae do not perform  
25 anoxygenic photosynthesis (Atteia et al., 2013). Alternatively, aerobic unicellular photosynthetic eukaryotes  
26 forced to anoxic conditions can switch to fermentative metabolism (Atteia et al., 2013) which could participate in  
27 the DOC production observed at 17 m depth (Fig. 3). However, their presence in the anoxic waters despite more  
28 favorable conditions in shallower oxygenated waters of the lake where green algae thrive (Chl. a peak between 5  
29 and 10 m, Fig. 2) seems unlikely.

30 Moreover, anoxic waters of stratified water bodies are typical habitats of anoxygenic photosynthesizers such as  
31 green or purple sulfur bacteria (GSB and PSB, respectively) (e.g. Fulton et al., 2018). These organisms usually  
32 operate in deeper and darker conditions than oxygenic organisms and use photosynthetic pigments different than  
33 Chl. a. Namely, GSB synthesize bacteriochlorophyll (BChl.) c, d or e while PSB synthesize BChl. a as their main  
34 photosynthetic pigments (Fulton et al., 2018; Hamilton, 2019). Although the molecular composition of these

35 pigments slightly differs from one another, some of them share close optical characteristics with Chl. a. Notably,  
 36 BChl. c and d and Chl. a share B and Q bands of absorption at around 430 and 660 nm, respectively (see Table 1  
 37 in Taniguchi and Lindsey, 2021). Meanwhile BChl. a bands are very distant from these values (~ 360 and 770  
 38 nm). Furthermore, BChl c, d and e and Chl. a also share very close fluorescence wavelengths around 670 nm while  
 39 BChl. a reemits around 790 nm (Table 2 in Taniguchi and Lindsey, 2021). Since the multi-parameter probe that  
 40 we used detects Chl. a based on these absorption and reemission wavelengths, the probe would most likely confuse  
 41 Chl. a with BChl. c and d (and possibly BChl. e) which are characteristic pigments of GSB while differentiating  
 42 well with BChl. a characteristic of PSB.

43 In conclusion, the third chlorophyll a peak in the anoxic waters of Lake La Alberca could partly be the result of  
 44 vertical migration of oxygenic photosynthetic organisms, but it more likely represents a bias of the probe towards  
 45 bacteriochlorophylls pigments typical of green sulfur bacteria, reflecting the presence and activity of anoxygenic  
 46 phototrophs at these depths.

47

#### 48 **Calculation of $\delta^{13}\text{C}$ signatures from the different DIC species ( $\text{CO}_{2(\text{aq})}$ , $\text{HCO}_3^-$ , $\text{CO}_3^{2-}$ ) from the bulk $\delta^{13}\text{C}_{\text{DIC}}$**

49 The analytical method of DIC isotopes determination allows to measure the bulk DIC isotopic composition (see  
 50 method in the main text), integrating the weighted average of  $\text{CO}_{2(\text{aq})}$ ,  $\text{HCO}_3^-$  and  $\text{CO}_3^{2-}$  respective isotopic  
 51 compositions such as:

$$52 \quad \delta^{13}\text{C}_{\text{DIC}} = ([\text{HCO}_3^-] * \delta^{13}\text{C}_{\text{HCO}_3^-} + [\text{CO}_3^{2-}] * \delta^{13}\text{C}_{\text{CO}_3^{2-}} + [\text{CO}_2] * \delta^{13}\text{C}_{\text{CO}_2}) / [\text{DIC}], \quad (1)$$

53 However, strong isotopic fractionations of about 10 ‰ exist between the dissolved  $\text{CO}_{2(\text{aq})}$  and the two other DIC  
 54 species (e.g. Mook et al., 1974). At the pH of the studied Mexican lakes (~ 9),  $\text{CO}_{2(\text{aq})}$  represents less than 0.5 %  
 55 of total DIC (Table S4). Therefore, its isotopic composition significantly differs from that of the bulk DIC and  
 56 needs to be calculated *a posteriori* when considering processes involving  $\text{CO}_2$  specifically.

57 We can isolate and calculate  $\delta^{13}\text{C}_{\text{CO}_2}$  by using the isotopic fractionation between the different DIC species ( $\alpha_{\text{X-Y}}$ ).  
 58 The “per mil fractionation”  $1000 \ln \alpha_{\text{X-Y}}$  – when around 10 ‰ or less – is almost identical to the isotopic difference  
 59 between different species ( $\Delta^{13}\text{C}_{\text{X-Y}} = \delta^{13}\text{C}_{\text{X}} - \delta^{13}\text{C}_{\text{Y}}$ ) (Sharp, 2017). Therefore, we use  $\Delta^{13}\text{C}$  to derive Eq. (1) such  
 60 as:

$$61 \quad \delta^{13}\text{C}_{\text{CO}_2} = \delta^{13}\text{C}_{\text{DIC}} - ([\text{HCO}_3^-] * \Delta^{13}\text{C}_{\text{HCO}_3^- \text{CO}_2} - [\text{CO}_3^{2-}] * \Delta^{13}\text{C}_{\text{CO}_3^{2-} \text{CO}_2}) / [\text{DIC}], \quad (2)$$

62 We used  $\Delta^{13}\text{C}$  data from Emrich et al. (1970) who provide isotopic fractionations between all three DIC species  
 63 as a function of temperature. All temperatures and resulting isotopic fractionations and compositions are  
 64 summarized in Table S5.

67

#### 68 **Calculation of the methane $\delta^{13}\text{C}$ endmember from the sediment porewaters of Lake La Alberca de los Espinos**

69 In La Alberca de los Espinos, the isotopic composition of DIC strikingly increases from the middle of the lake  
 70 water column to the first 10 cm of sediment porewaters (Table 2 and S4). This can be well explained by the action

71 of acetoclastic methanogenesis which degrades sedimentary OM to produce  $^{13}\text{C}$ -depleted methane and  $^{13}\text{C}$ -rich  
72 carbon dioxide diffusing upward in the water column (main text part 5.2.4). Following the simplified equation

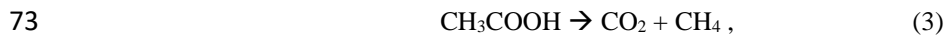

74 the C isotopic composition of methane ( $\delta^{13}\text{C}_{\text{CH}_4}$ ) can be calculated by mass balance based on C isotopic  
75 compositions of sedimentary OC and dissolved  $\text{CO}_2$  ( $\delta^{13}\text{C}_{\text{SOC}}$  and  $\delta^{13}\text{C}_{\text{CO}_2}$ , respectively) such that:

76 
$$\delta^{13}\text{C}_{\text{SOC}} = 0.5 * \delta^{13}\text{C}_{\text{CO}_2} + 0.5 * \delta^{13}\text{C}_{\text{CH}_4}, \quad (4)$$

77 and thus:

78 
$$\delta^{13}\text{C}_{\text{CH}_4} = 2 * \delta^{13}\text{C}_{\text{SOC}} - \delta^{13}\text{C}_{\text{CO}_2}. \quad (5)$$

79 Following Eq. (5), we calculate  $\delta^{13}\text{C}_{\text{CH}_4}$  at depth where  $\delta^{13}\text{C}_{\text{SOC}}$  and  $\delta^{13}\text{C}_{\text{CO}_2}$  are available, *i.e.* at 0.5 and 7 cm  
80 depths within the sediments of Lake La Alberca (Table S4).

81 In this calculation, we consider that the isotopic composition of the sedimentary organic carbon that we measured  
82 corresponds to the one used by methanogen organisms. Moreover, we consider that the bulk isotopic composition  
83 of porewater DIC ( $\delta^{13}\text{C}_{\text{DIC}}$ ) is related to methanogenesis. This is supported by the fact that (i) the very positive  
84  $\delta^{13}\text{C}_{\text{DIC}}$  can unequivocally be explained by methanogenesis while differing from the water column  $\delta^{13}\text{C}_{\text{DIC}}$  and (ii)  
85 that the DIC concentration gradient between the porewater and the lake water forces the DIC to diffuse from the  
86 porewater to the lake water rather than the other way around. Nonetheless, we consider that there is isotopic  
87 exchange between the different DIC species of the porewater and lake water (as suggested by the diffusion of DIC  
88 through the porewaters and sediment-water interface). Hence, we use the calculated  $\delta^{13}\text{C}_{\text{CO}_2}$  value rather than bulk  
89  $\delta^{13}\text{C}_{\text{DIC}}$  in the calculation of Eq. (5).

90 Numerical derivation of Eq. (5) for depths 0.5 and 7 cm in the sediments are  $\delta^{13}\text{C}_{\text{CH}_4} = -59.0 \text{ ‰}$  and  $\delta^{13}\text{C}_{\text{CH}_4} = -$   
91  $56.8 \text{ ‰}$ , respectively.

92

93

# Supplementary Figures

94

95

## Alchichica

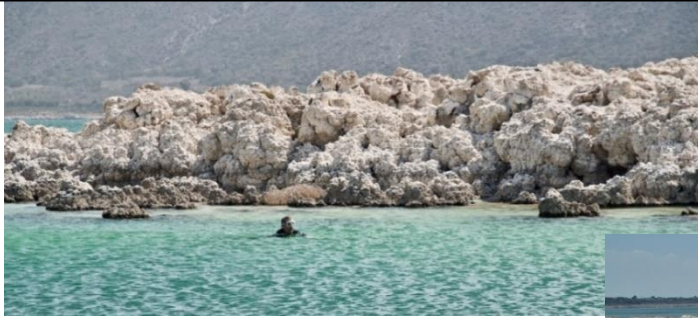

99

100

101

102

103

104

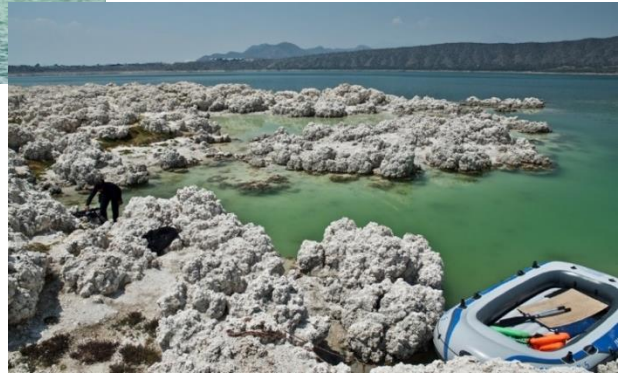

## Atexcac

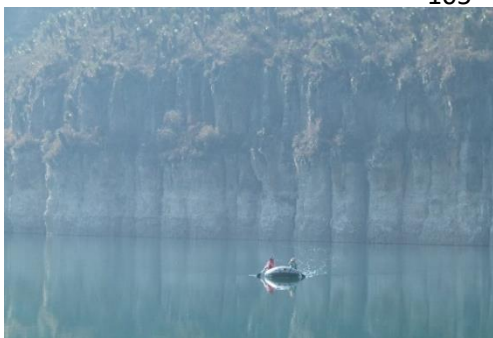

111

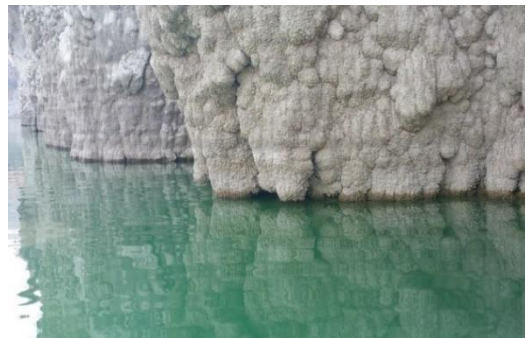

112

## La Preciosa

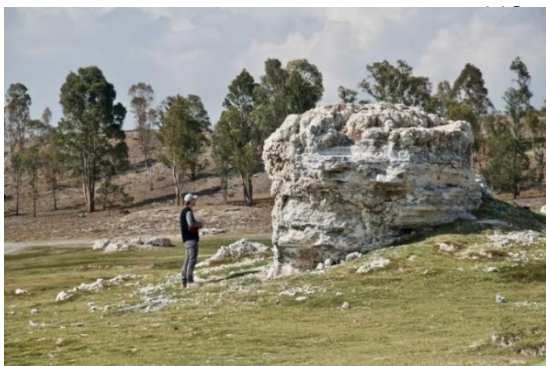

119

## Alberca de los Espinos

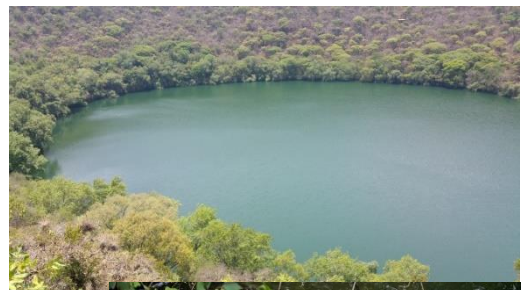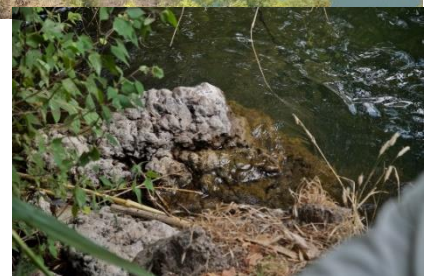

120

Figure S1. Photographs of the lakes showing different levels of emerged microbialites.

121

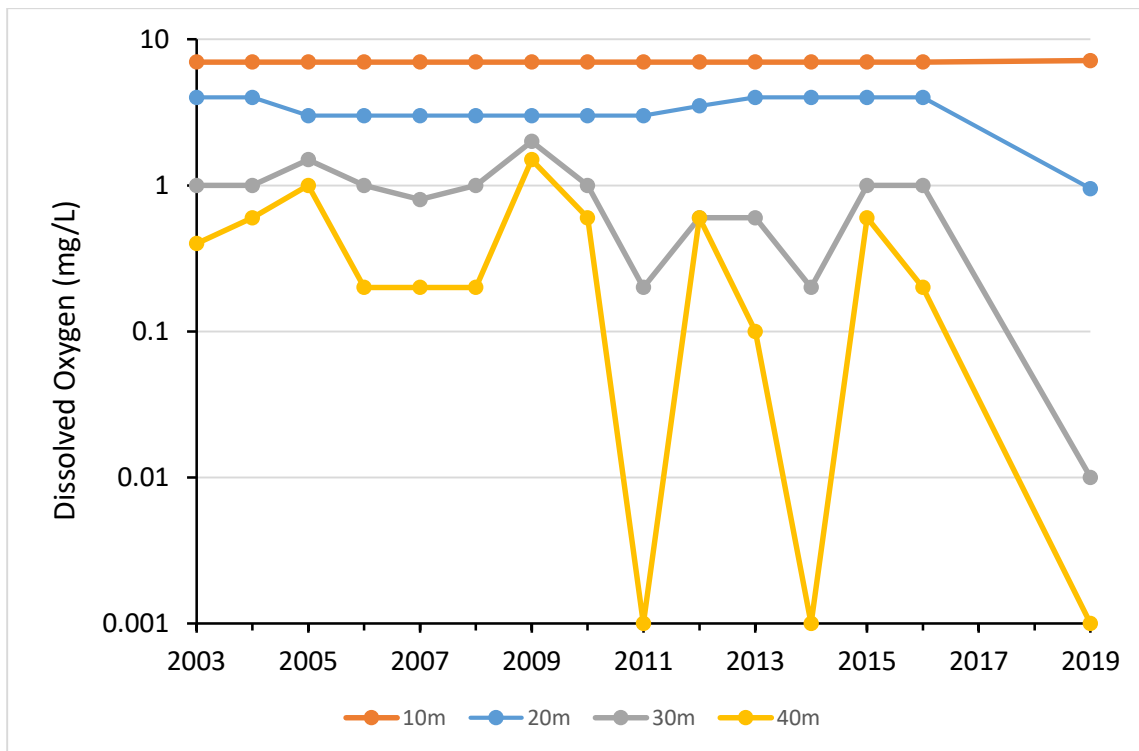

122

123 Figure S2. Dissolved oxygen (DO) concentrations in mg/L at 10, 20, 30 and 40m depth in lake  
 124 Alchichica in May since 2003. Data between 2003 and 2017 from Macek et al., 2020. We notice  
 125 that DO is lower in 2019 than other years at each depth pointing out the sharper stratification  
 126 of the lake in 2019.

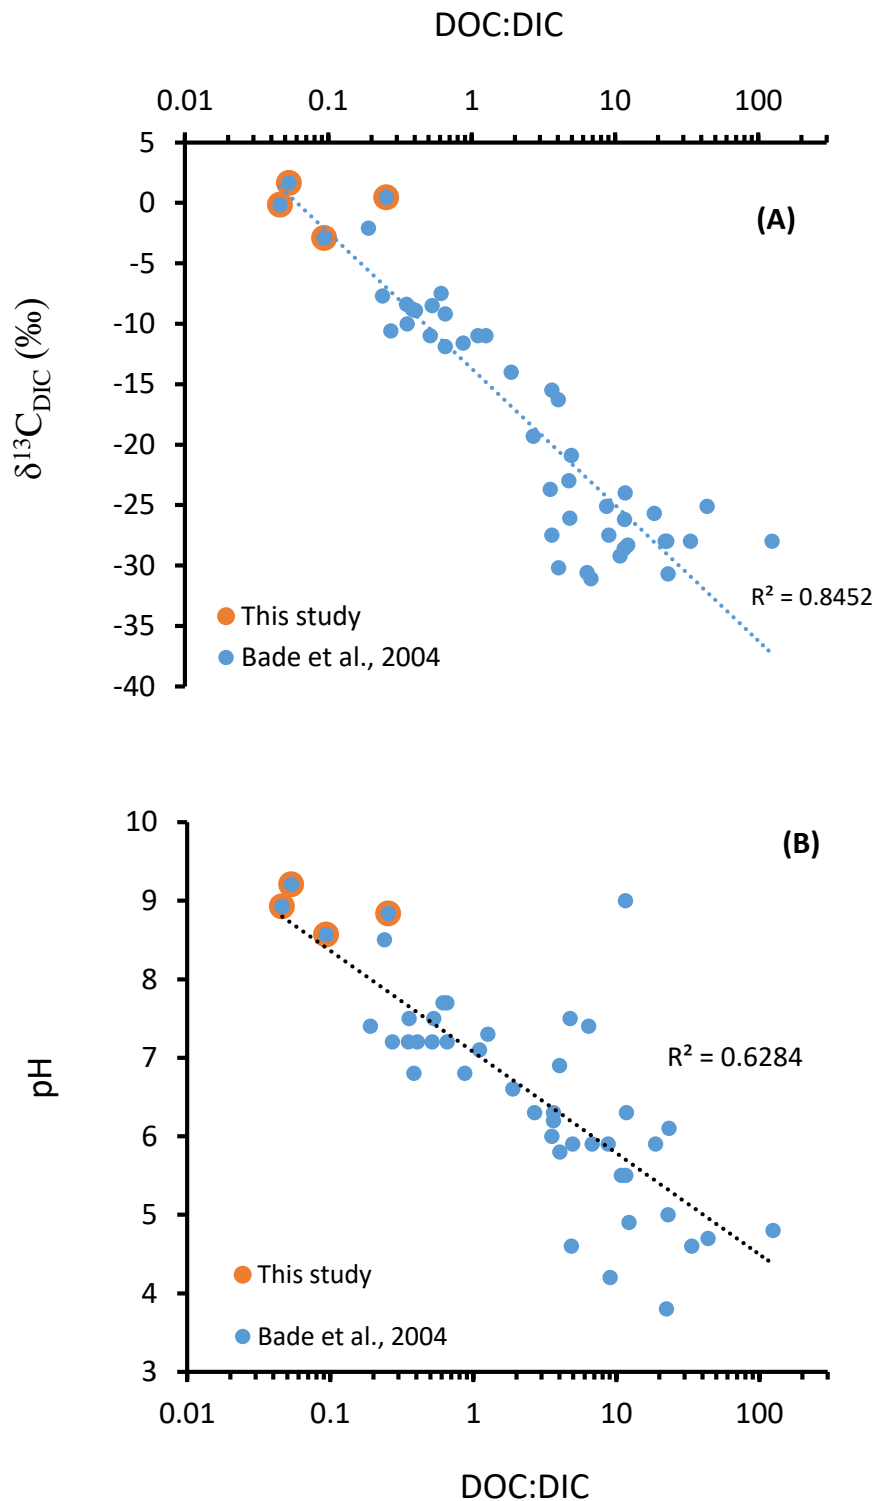

153 Figure S3. DOC:DIC ratios, pH and  $\delta^{13}\text{C}_{\text{DIC}}$  values from different lakes with values compiled from  
 154 Bade et al., 2004 and the four Mexican lakes from this study. (A)  $\delta^{13}\text{C}_{\text{DIC}}$  as a function of  
 155 DOC:DIC ratio represented with a logarithmic x abscises scale and logarithmic trend line and  
 156 corresponding correlation coefficient  $R^2$ . (B) pH as a function of DOC:DIC ratio again  
 157 logarithmic x abscises and trend line. Most of the dispersion occurring for both graphs results  
 158 from lakes with low [DIC] < 145  $\mu\text{M}$ .

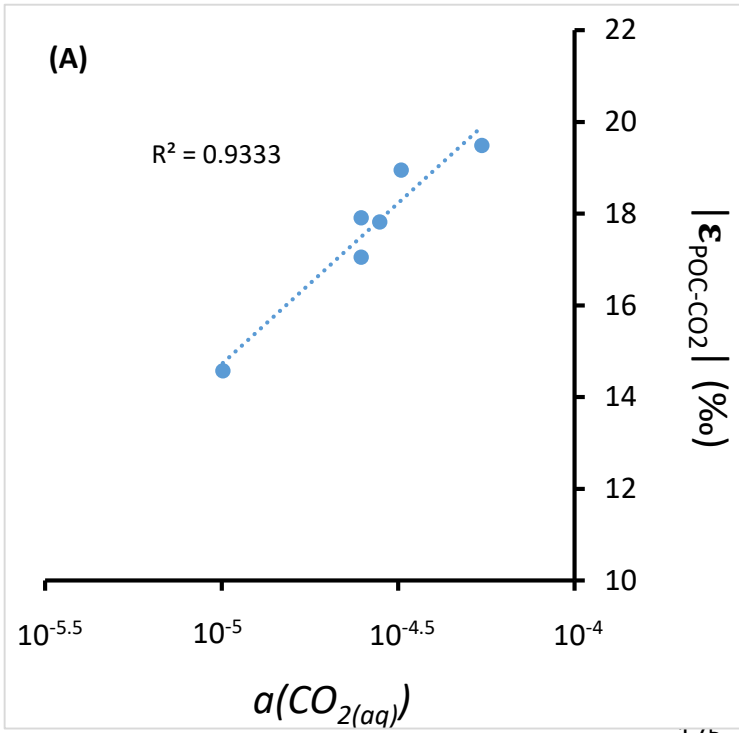

175

Figure S4. Cross plots of DIC species activities versus absolute values of calculated C isotopic fractionations between POC and CO<sub>2</sub> at depths of peak oxygenic photosynthesis where data was available (5 and 30 m for Alchichica, 16 m for Atexcac, 10 and 12.5 m for La Preciosa and 7m for Alberca). (A) Dissolved CO<sub>2(aq)</sub> activity and (B) bicarbonate activity as functions of  $|\epsilon_{\text{POC-CO}_2}|$  in ‰ plus linear correlation trends and corresponding R<sup>2</sup>.

176

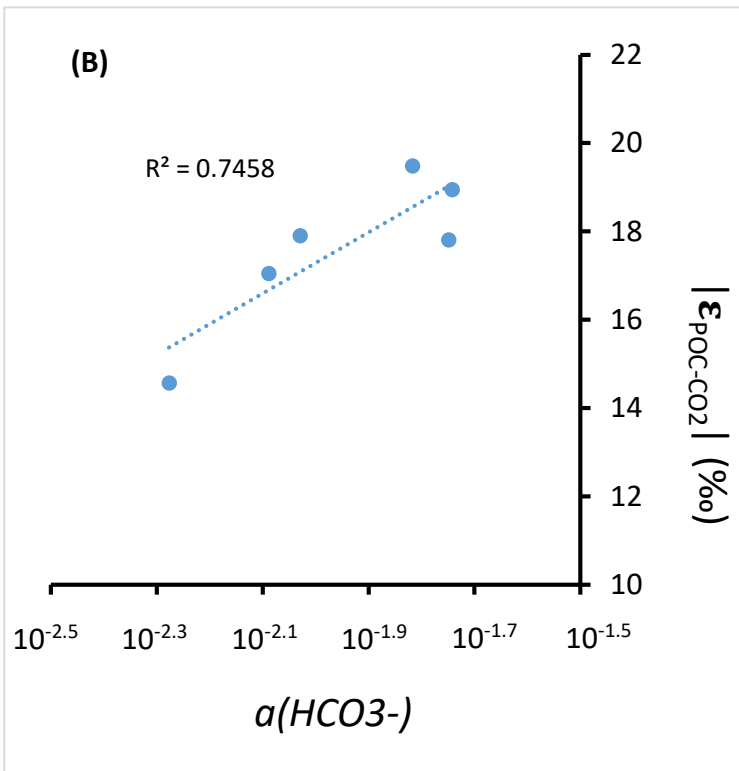

190

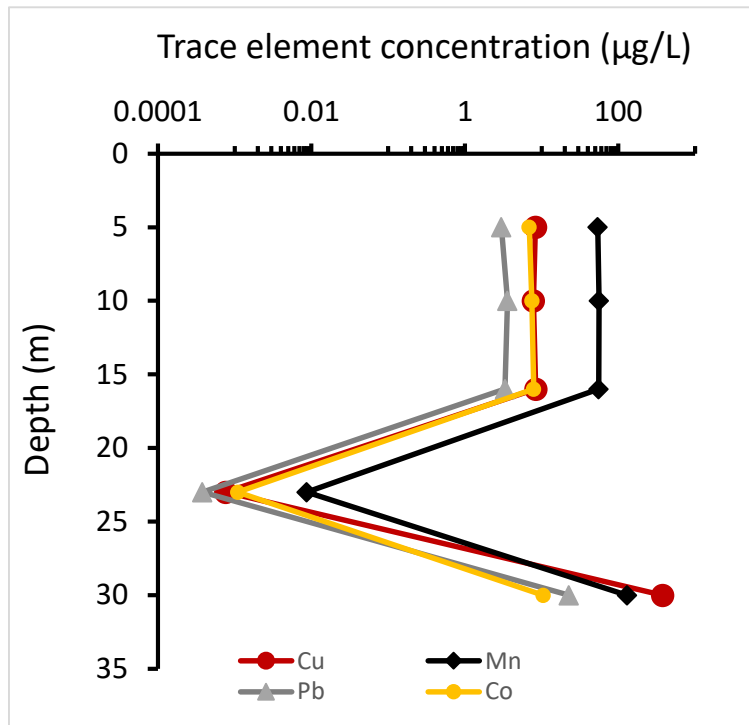

191

192 Figure S5. Depth profile of several metal ions dissolved in the waters of Lake Atexcac.



193

194

195

196

197

198

199

200

201

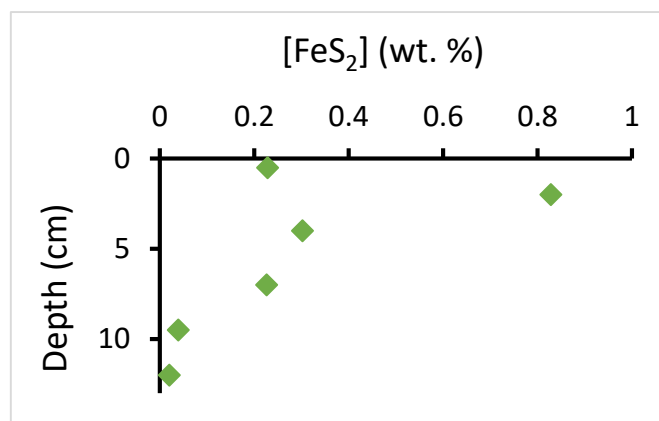

202 Figure S6. Pyrite concentrations in weight percent in the surficial sediments of Lake La Alberca  
203 de los Espinos.

204

205 **Supplementary Tables**

206

207 Table S1

208 Ionic concentrations in the water columns of the four lakes. TDP and TDS stands for ‘total dissolved P’  
 209 and S’, respectively, and were measured by ICP-AES. Fe and Mn were measured by ICP-MS. Nitrogen  
 210 species were measured by colorimetry and Cl<sup>-</sup> and SO<sub>4</sub><sup>2-</sup> by chromatography.

211

| Lake                      | Sample     | TDP      | NH <sub>4</sub> <sup>+</sup> | Fe  | Mn       | SO <sub>4</sub> <sup>2-</sup> | TDS   | Cl <sup>-</sup> |
|---------------------------|------------|----------|------------------------------|-----|----------|-------------------------------|-------|-----------------|
|                           |            | μmoles/L |                              |     | mmoles/L |                               |       |                 |
| Alchichica                | AL 4.9m    | 0.3      | 3.1                          | 0.3 | 1.4      | 11.8                          | 10.1  | 107             |
|                           | AL 5m      | 0.4      | 2.9                          | 0.2 | 1.5      | 11.9                          | 10.2  | 107             |
|                           | AL 10m     | 0.4      | 2.4                          | 0.3 | 1.7      | 11.8                          | 10.1  | 106             |
|                           | AL 20m     | 0.5      | 3.5                          | 0.2 | 0.4      | 11.8                          | 10.1  | 106             |
|                           | AL 30m     | 1.6      | 2.9                          | 0.2 | 0.4      | 11.7                          | 10.1  | 106             |
|                           | AL 40m     | 1.8      | 3.5                          | 0.1 | 0.5      | 11.8                          | 10.0  | 107             |
|                           | AL 50m     | 2.5      | 3.3                          | <LD | 0.4      | 12.0                          | 10.0  | 108             |
|                           | AL 55m     | 2.6      | 13.0                         | <LD | 0.5      | 12.0                          | 9.7   | 109             |
|                           | AL 60m     | 3.2      | 3.9                          | 0.1 | 1.0      | 12.2                          | 10.0  | 111             |
| Atexcac                   | ATX 5m     | 0.3      | 2.4                          | 0.8 | 1.0      | 2.5                           | 2.4   | 122             |
|                           | ATX 10m    | 0.2      | 2.4                          | 0.7 | 1.0      | 2.5                           | 2.4   | 122             |
|                           | ATX 16m    | 0.2      | 2.5                          | 0.4 | 1.0      | 2.5                           | 2.4   | 121             |
|                           | ATX 23m    | 0.4      | 2.5                          | 0.2 | 0.0      | 2.6                           | 2.5   | 126             |
|                           | ATX 30m    | 0.5      | 2.9                          | 0.1 | 2.4      | 2.5                           | 2.4   | 124             |
| La Preciosa               | LP 5m      | 0.2      | 1.8                          | 0.1 | 1.1      | 1.2                           | 1.2   | 8.4             |
|                           | LP 8m      | 0.2      | 2.0                          | <LD | 0.3      | 1.2                           | 1.2   | 8.2             |
|                           | LP 10m     | 0.2      | 1.6                          | <LD | 0.4      | 1.2                           | 1.2   | 8.0             |
|                           | LP 12.5m   | 0.2      | 1.4                          | <LD | 0.4      | 1.2                           | 1.2   | 7.8             |
|                           | LP 15m     | <LD      | 2.0                          | <LD | 0.6      | 1.2                           | 1.2   | 7.9             |
|                           | LP 20m     | 0.3      | 2.3                          | <LD | 1.4      | 1.2                           | 1.2   | 7.9             |
| La Alberca de Los Espinos | LP 30m     | 0.3      | 2.2                          | <LD | 1.0      | 1.2                           | 1.2   | 7.9             |
|                           | Albesp 5m  | 2.9      | 2.4                          | <LD | 1.5      | 0.012                         | 0.009 | 4.2             |
|                           | Albesp 7m  | 3.0      | 3.1                          | <LD | 0.8      | <LD                           | 0.008 | 4.2             |
|                           | Albesp 10m | 7.6      | 3.5                          | <LD | 0.5      | <LD                           | 0.006 | 4.0             |
|                           | Albesp 17m | 11.0     | 2.5                          | <LD | 0.6      | <LD                           | 0.009 | 4.0             |
|                           | Albesp 20m | 15.6     | 8.5                          | <LD | 1.0      | <LD                           | 0.008 | 4.2             |
| Albesp 25m                | 27.4       | 3.3      | 0.2                          | 1.9 | <LD      | 0.013                         | 4.2   |                 |

212

213 Table S2.

214 Surficial solid sediment and pore water analyses: C:N ratio and C isotopic composition of sedimentary  
 215 organic matter and carbon (SOM, SOC), concentrations and isotopic compositions of DIC in the pore  
 216 waters.

| Lake                             | Sample name    | Depth | (C:N) <sub>SOM</sub> | $\delta^{13}\text{C}_{\text{SOC}}$ | DIC      | $\delta^{13}\text{C}_{\text{DIC}}$ |
|----------------------------------|----------------|-------|----------------------|------------------------------------|----------|------------------------------------|
|                                  |                | cm    | (molar)              | ‰                                  | mmoles/L | ‰                                  |
| Alchichica                       | AL19_C2a_01    | 0-1   | 10.4                 | -25.7                              | 35.8     | 0.4                                |
|                                  | AL19_C2a_02    | 1-3   | 10.2                 | -25.7                              | 36.2     | 0.0                                |
|                                  | AL19_C2a_03    | 3-5   | ND.                  | -25.3                              | 36.8     | -0.1                               |
|                                  | AL19_C2a_04    | 5-7   | 10.4                 | -25.1                              | 34.5     | -0.3                               |
|                                  | AL19_C2a_05    | 7-10  | 10.4                 | -24.6                              | 34.6     | -0.4                               |
|                                  | AL19_C2a_06    | 10-13 | 10.4                 | -24.5                              | 34.9     | -0.5                               |
| Atexcac                          | ATX19_C1_1     | 0-1   | 8.2                  | -26.7                              | 24.4     | 0.3                                |
|                                  | ATX19_C1_2     | 1-2   | 7.9                  | -26.8                              | 22.5     | -0.2                               |
|                                  | ATX19_C1_3     | 2-4   | 8.0                  | -26.8                              | 20.7     | 0.4                                |
|                                  | ATX19_C1_S4    | 4-7   | 8.6                  | -27.0                              | ND.      | ND.                                |
|                                  | ATX19_C1_4     | 7-9   | ND.                  | -26.8                              | 22.7     | 0.5                                |
|                                  | ATX19_C1_5     | 9-10  | 9.3                  | -26.9                              | 23.1     | 0.5                                |
|                                  | ATX19_C1_S6    | 10-12 | 9.6                  | -27.0                              | 25.7     | 0.0                                |
| La Preciosa                      | LP16_C3_7      | 0-2   | 9.8                  | -25.1                              | ND.      | ND.                                |
|                                  | LP16_C3_8      | 2-4   | 9.6                  | -25.8                              | ND.      | ND.                                |
|                                  | LP16_C3_9      | 8-10  | 11.0                 | -23.2                              | ND.      | ND.                                |
| La Alberca<br>de Los<br>Espinosa | ALBESP19_C3_1  | 0-1   | 13.1                 | -28.6                              | 11.2     | 9.4                                |
|                                  | ALBESP19_C3_2  | 1-3   | 12.3                 | -29.4                              | ND.      | ND.                                |
|                                  | ALBESP19_C3_3  | 3-5   | 11.8                 | -29.2                              | ND.      | ND.                                |
|                                  | ALBESP19_C3_4  | 5-9   | 11.6                 | -27.9                              | 11.9     | 7.7                                |
|                                  | ALBESP19_C3_S5 | 9-10  | 14.3                 | -25.7                              | ND.      | ND.                                |
|                                  | ALBESP19_C3_5  | 10-14 | 13.5                 | -25.4                              | ND.      | ND.                                |

217

218 Table S3

219 Iron, sulfur and manganese concentrations in the particulate matter, measured with ICP-AES. <LD =  
220 below detection limits.

| Lake                             | Sample     | Fe                        | S    | Mn   |
|----------------------------------|------------|---------------------------|------|------|
|                                  |            | 10 <sup>3</sup> *µmoles/L |      |      |
| Alchichica                       | AL 4.9m    | 178                       | 3426 | 7    |
|                                  | AL 30m     | 61                        | 1224 | 3    |
|                                  | AL 35.6m   | 64                        | 1631 | <LD  |
|                                  | AL 40.6m   | 47                        | 1630 | 0.2  |
| Atexcac                          | ATX 5m     | 821                       | 1624 | 15   |
|                                  | ATX 10m    | 973                       | 2486 | 21   |
|                                  | ATX 16m    | 368                       | 1195 | 20   |
| La Preciosa                      | LP 5m      | 295                       | 553  | 70   |
|                                  | LP 8m      | 236                       | 575  | 52   |
|                                  | LP 10m     | 305                       | 525  | 76   |
|                                  | LP 12.5m   | 390                       | 661  | 108  |
|                                  | LP 15m     | 194                       | 452  | 124  |
| La Alberca<br>de Los<br>Espinosa | Albosp 5m  | 25                        | 57   | 29   |
|                                  | Albosp 7m  | 26                        | 50   | 28   |
|                                  | Albosp 10m | 20                        | 68   | 63   |
|                                  | Albosp 17m | 24                        | 97   | 1173 |
|                                  | Albosp 20m | 230                       | 90   | 996  |
|                                  | Albosp 25m | 5974                      | 561  | 156  |

221

223 Calculated activities of the different dissolved inorganic carbon species, CO<sub>2</sub> partial pressure (P<sub>CO2</sub>),  
 224 ratio of P<sub>CO2</sub> with atmospheric P<sub>CO2</sub> at 2320m altitude and pH presented for waters at different depths in  
 225 2019 and surface waters of years 2012, 2014 and 2018.

| Lake                      | Sample     | $a(\text{CO}_{2(aq)})$ | $a(\text{HCO}_3^-)$ | $a(\text{CO}_3^{2-})$ | P <sub>CO2</sub> | P <sub>CO2</sub> / P <sub>CO2-atm</sub> | pH   |
|---------------------------|------------|------------------------|---------------------|-----------------------|------------------|-----------------------------------------|------|
|                           |            | LOG10                  |                     |                       | LOG10 (atm)      |                                         |      |
| Alchichica                | AL 5m      | -4.49                  | -1.74               | -2.98                 | -3.02            | 3.1                                     | 9.14 |
|                           | AL 10m     | -4.61                  | -1.79               | -2.95                 | -3.14            | 2.4                                     | 9.22 |
|                           | AL 20m     | -4.57                  | -1.75               | -2.93                 | -3.10            | 2.6                                     | 9.23 |
|                           | AL 30m     | -4.55                  | -1.75               | -2.95                 | -3.08            | 2.7                                     | 9.22 |
|                           | AL 40m     | -4.57                  | -1.75               | -2.93                 | -3.10            | 2.6                                     | 9.24 |
|                           | AL 50m     | -4.48                  | -1.73               | -2.98                 | -3.01            | 3.2                                     | 9.17 |
|                           | AL 55m     | -4.49                  | -1.73               | -2.97                 | -3.02            | 3.1                                     | 9.18 |
|                           | AL 60m     | -4.59                  | -1.76               | -2.93                 | -3.12            | 2.5                                     | 9.25 |
| Atexcac                   | ATX 5m     | -4.30                  | -1.83               | -3.35                 | -2.83            | 4.9                                     | 8.85 |
|                           | ATX 10m    | -4.30                  | -1.83               | -3.36                 | -2.83            | 4.9                                     | 8.85 |
|                           | ATX 16m    | -4.26                  | -1.82               | -3.37                 | -2.79            | 5.3                                     | 8.85 |
|                           | ATX 23m    | -4.26                  | -1.85               | -3.45                 | -2.79            | 5.4                                     | 8.82 |
|                           | ATX 30m    | -4.23                  | -1.83               | -3.43                 | -2.76            | 5.7                                     | 8.82 |
| La Preciosa               | LP 5m      | -4.67                  | -2.04               | -3.40                 | -3.20            | 2.1                                     | 9.02 |
|                           | LP 8m      | -4.66                  | -2.04               | -3.41                 | -3.19            | 2.1                                     | 9.01 |
|                           | LP 10m     | -4.60                  | -2.03               | -3.45                 | -3.13            | 2.4                                     | 8.97 |
|                           | LP 12.5m   | -4.60                  | -2.09               | -3.57                 | -3.13            | 2.4                                     | 8.92 |
|                           | LP 15m     | -4.49                  | -2.02               | -3.55                 | -3.02            | 3.2                                     | 8.88 |
|                           | LP 20m     | -4.48                  | -2.02               | -3.55                 | -3.01            | 3.2                                     | 8.88 |
|                           | LP 31m     | -4.48                  | -2.02               | -3.56                 | -3.01            | 3.2                                     | 8.88 |
| La Alberca de Los Espinos | Albesp 5m  | -5.06                  | -2.30               | -3.53                 | -3.59            | 0.9                                     | 9.12 |
|                           | Albesp 7m  | -5.00                  | -2.28               | -3.54                 | -3.53            | 1.0                                     | 9.09 |
|                           | Albesp 10m | -4.58                  | -2.23               | -3.88                 | -3.11            | 2.6                                     | 8.73 |
|                           | Albesp 17m | -4.53                  | -2.23               | -3.93                 | -3.06            | 2.9                                     | 8.7  |
|                           | Albesp 20m | -3.88                  | -2.18               | -4.47                 | -2.41            | 12.7                                    | 8.11 |
|                           | Albesp 25m | -3.40                  | -2.15               | -4.89                 | -1.93            | 38.6                                    | 7.66 |

| 0 m         |          | Month-Year |       |       |       |      |      |
|-------------|----------|------------|-------|-------|-------|------|------|
| Alchichica  | may-14   | -4.25      | -1.62 | -2.98 | -2.78 | 5.4  | 9.02 |
|             | jan-12   | -4.28      | -1.62 | -2.97 | -2.81 | 5.0  | 9.08 |
| Atexcac     | may-14   | -3.77      | -1.70 | -3.62 | -2.30 | 16.5 | 8.45 |
|             | jan-12   | -4.07      | -1.74 | -3.40 | -2.60 | 8.2  | 8.75 |
| La Alberca  | may-14   | -4.52      | -2.21 | -3.89 | -3.05 | 2.9  | 8.67 |
| La Preciosa | may-14   | -4.34      | -1.98 | -3.61 | -2.87 | 4.4  | 8.75 |
|             | jan-12   | -4.46      | -1.99 | -3.52 | -2.99 | 3.3  | 8.88 |
|             | march-18 | -5.14      | -2.71 | -4.27 | -3.67 | 0.7  | 8.83 |

227 Table S5

228 Isotopic fractionations between the different DIC species according to the temperature at different  
 229 depths in the water columns; calculated based on fractionation equations by Emrich et al., 1970.

| Lake                      | Sample     | Temperature | $\Delta^{13}\text{C}_{\text{HCO}_3\text{-CO}_2(\text{aq})}$ | $\Delta^{13}\text{C}_{\text{CO}_3\text{-CO}_2(\text{aq})}$ | $\delta^{13}\text{C}_{\text{CO}_2(\text{aq})}$ |
|---------------------------|------------|-------------|-------------------------------------------------------------|------------------------------------------------------------|------------------------------------------------|
|                           |            | °C          | ‰                                                           |                                                            |                                                |
| Alchichica                | AL 5m      | 19.2        | 9.7                                                         | 11.5                                                       | -7.7                                           |
|                           | AL 10m     | 18.9        | 9.7                                                         | 11.6                                                       | -7.8                                           |
|                           | AL 20m     | 16.3        | 10.0                                                        | 12.0                                                       | -8.5                                           |
|                           | AL 30m     | 15.5        | 10.1                                                        | 12.1                                                       | -8.5                                           |
|                           | AL 40m     | 15.3        | 10.1                                                        | 12.1                                                       | -8.7                                           |
|                           | AL 50m     | 15.2        | 10.1                                                        | 12.1                                                       | -8.6                                           |
|                           | AL 55m     | 15.2        | 10.1                                                        | 12.1                                                       | -8.7                                           |
|                           | AL 60m     | 15.2        | 10.1                                                        | 12.1                                                       | -8.7                                           |
| Atexcac                   | ATX 5m     | 20.1        | 9.5                                                         | 11.4                                                       | -9.2                                           |
|                           | ATX 10m    | 19.7        | 9.6                                                         | 11.4                                                       | -9.1                                           |
|                           | ATX 16m    | 17.2        | 9.9                                                         | 11.8                                                       | -9.5                                           |
|                           | ATX 23m    | 15.7        | 10.1                                                        | 12.1                                                       | -9.1                                           |
|                           | ATX 30m    | 15.6        | 10.1                                                        | 12.1                                                       | -9.8                                           |
| La Preciosa               | LP 5m      | 19.5        | 9.6                                                         | 11.5                                                       | -9.5                                           |
|                           | LP 8m      | 19.0        | 9.7                                                         | 11.6                                                       | -9.5                                           |
|                           | LP 10m     | 18.3        | 9.8                                                         | 11.7                                                       | -9.5                                           |
|                           | LP 12.5m   | 17.0        | 9.9                                                         | 11.9                                                       | -10.0                                          |
|                           | LP 15m     | 16.2        | 10.0                                                        | 12.0                                                       | -10.3                                          |
|                           | LP 20m     | 15.6        | 10.1                                                        | 12.1                                                       | -10.4                                          |
|                           | LP 31m     | 15.4        | 10.1                                                        | 12.1                                                       | -10.4                                          |
| La Alberca de Los Espinos | Albesp 5m  | 22.8        | 9.2                                                         | 11.0                                                       | -11.8                                          |
|                           | Albesp 7m  | 22.1        | 9.3                                                         | 11.1                                                       | -11.7                                          |
|                           | Albesp 10m | 19.6        | 9.6                                                         | 11.5                                                       | -13.6                                          |
|                           | Albesp 17m | 17.4        | 9.9                                                         | 11.8                                                       | -13.1                                          |
|                           | Albesp 20m | 16.9        | 9.9                                                         | 11.9                                                       | -12.9                                          |
|                           | Albesp 25m | 16.7        | 9.9                                                         | 11.9                                                       | -11.3                                          |

230

231

232 **References**

233 Atteia, A., van Lis, R., Tielens, A.G. and Martin, W.F.: Anaerobic energy metabolism in unicellular  
 234 photosynthetic eukaryotes. (BBA)-Bioenergetics, 1827, 210-223. <https://doi.org/10.1016/j.bbabi.2012.08.002> ,  
 235 2013.

236 Bade, D.L., Carpenter, S.R., Cole, J.J., Hanson, P.C., Hesslein, R.H.: Controls of  $\delta^{13}\text{C}$ -DIC in lakes:  
 237 Geochemistry, lake metabolism, and morphometry. Limnol. Oceanogr. 49, 1160–1172.  
 238 <https://doi.org/10.4319/lo.2004.49.4.1160> , 2004.

239 Emrich, K., Ehhalt, D.H., Vogel, J.C.: Carbon isotope fractionation during the precipitation of calcium  
 240 carbonate. Earth Planet. Sci. Lett. 8, 363–371. [https://doi.org/10.1016/0012-821X\(70\)90109-3](https://doi.org/10.1016/0012-821X(70)90109-3) , 1970.

241 Fulton, J.M., Arthur, M.A., Thomas, B., Freeman, K.H.: Pigment carbon and nitrogen isotopic signatures in  
 242 euxinic basins. Geobiology 16, 429–445. <https://doi.org/10.1111/gbi.12285> , 2018.

- 243 Hamilton, T.L.: The trouble with oxygen: The ecophysiology of extant phototrophs and implications for the  
244 evolution of oxygenic photosynthesis. *Free Radical Biology and Medicine*, 140, 233-249.  
245 <https://doi.org/10.1016/j.freeradbiomed.2019.05.003> , 2019.
- 246 Macek, M., Medina, X.S., Picazo, A., Peřtová, D., Reyes, F.B., Hernández, J.R.M., Alcocer, J., Ibarra, M.M.,  
247 Camacho, A.: Spirostomum teres: A Long Term Study of an Anoxic-Hypolimnion Population Feeding upon  
248 Photosynthesizing Microorganisms. *Acta Protozool.* 59, 13–38.  
249 <https://doi.org/10.4467/16890027AP.20.002.12158> , 2020.
- 250 Mook, W.G., Bommerson, J.C., Staverman, W.H.: Carbon isotope fractionation between dissolved bicarbonate  
251 and gaseous carbon dioxide. *Earth Planet. Sci. Lett.* 22, 169–176. [https://doi.org/10.1016/0012-821X\(74\)90078-](https://doi.org/10.1016/0012-821X(74)90078-8)  
252 [8](https://doi.org/10.1016/0012-821X(74)90078-8) , 1974.
- 253 Sharp, Z.: Principles of stable isotope geochemistry. <https://doi.org/10.25844/h9q1-0p82> , 2017.
- 254 Taniguchi, M. and Lindsey, J.S.: Absorption and fluorescence spectral database of chlorophylls and analogues.  
255 *Photochemistry and Photobiology*, 97, 136-165. <https://doi.org/10.1111/php.13319> , 2021.
- 256
